# Supplementary material for: Phase transitions and ferroelasticity–multiferroicity in bulk and two-dimensional silver and copper monohalides
Source: Royal Society of Chemistry journal article supplement (doi:10.1039/c9nh00172g), 2019-01-01
Supplement: c9nh00172g1.pdf [file c9nh00172g1.pdf]

Electronic Supplementary Information

**Phase Transitions and Ferroelasticity/Multiferroicity in Bulk and Two-dimensional Silver and Copper Monohalides**

Yaxin Gao<sup>1</sup>, Menghao Wu<sup>1\*</sup>, Xiao Cheng Zeng<sup>2\*</sup>

<sup>1</sup>School of Physics and Wuhan National High Magnetic Field Center, Huazhong University of Science and Technology, Hubei, Wuhan, China 430074

<sup>2</sup>Department of Chemistry and Department of Mechanical & Materials Engineering, University of Nebraska—Lincoln, Lincoln, Nebraska 68588, United States

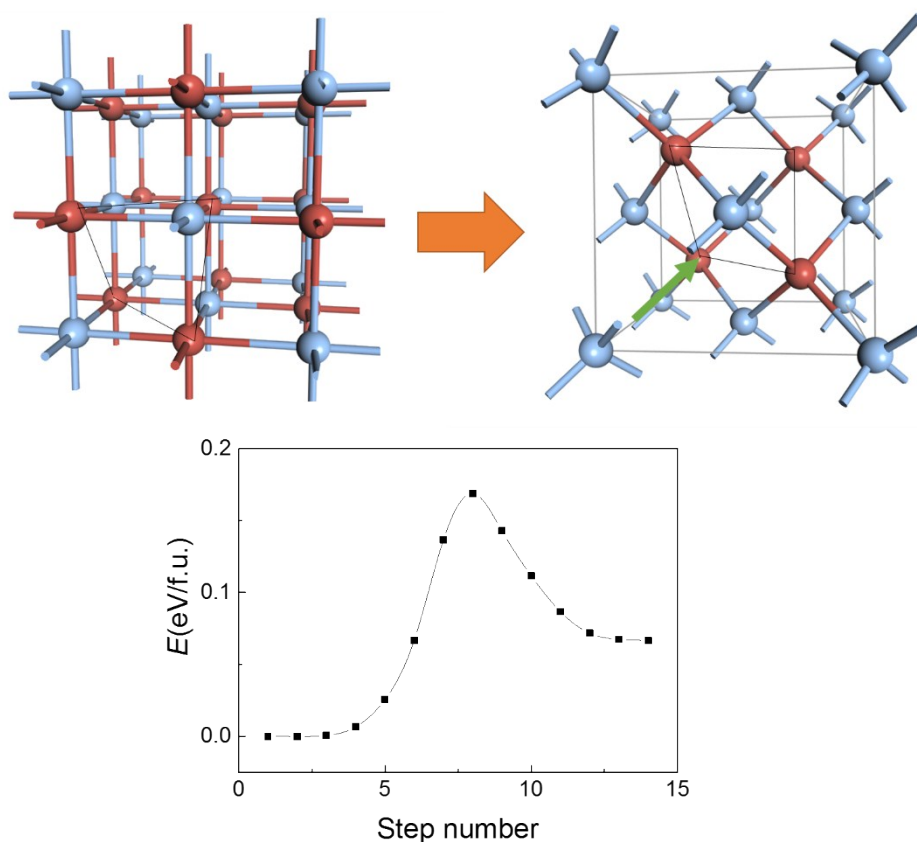

Figure S1. Computed pathway of transformation of RS into ZB phase by simultaneously displacing all halide anions in RS structure by the vector  $(\frac{1}{4}, \frac{1}{4}, \frac{1}{4})$ .

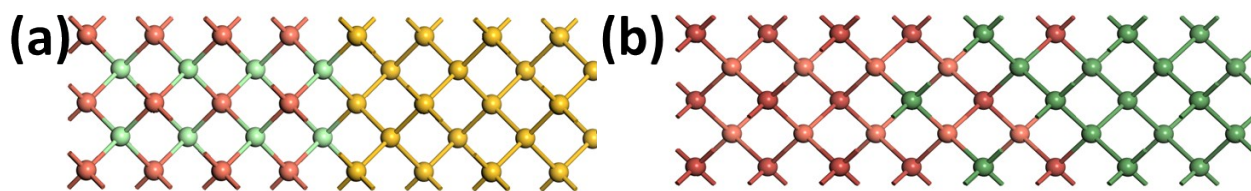

Figure S2. Two typical models of chemical multi-junction: (a) CuCl/Si and (b) CuBr/Cu<sub>1-x</sub>Br<sub>1-x</sub>Ge<sub>x</sub>/Ge.

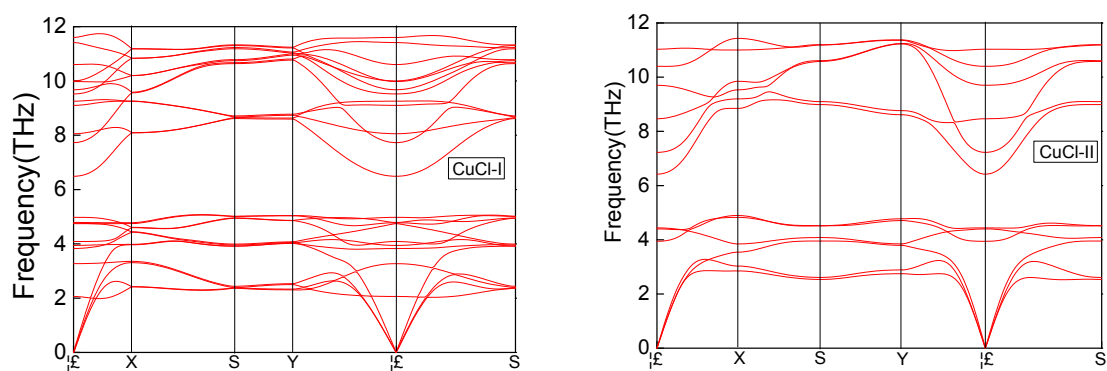

Figure S3. Phonon dispersion of 2D polymorph I and I of CuCl calculated by using Phonopy.

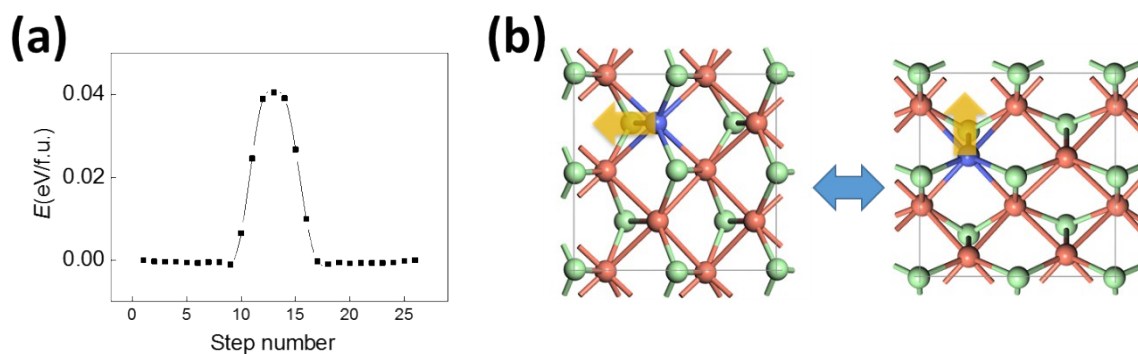

Figure S4. (a) The switching pathway for 2D CuCl polymorph II, and (b) 90 degree ferromagnetic switching induced by 90 degree ferroelectric switching (ferroelastic switching) upon doping of Ni ions.
